# Supplementary material for: Occurrence of Antimicrobial-Resistant Bacteria in Intestinal Contents of Wild Marine Fish in Chile
Source: MDPI journal article supplement (doi:10.3390/antibiotics13040332), 2024-04-05
Supplement: s1 [file s1]

**Table S1. Identification and source of resistant isolates from intestinal content of pelagic fishes.**

| Isolate | Fish species             | Accession N° | Closest species (Accession N°)                | % Identity |
|---------|--------------------------|--------------|-----------------------------------------------|------------|
| NCIA21  | <i>Seriola lalandi</i>   | PP277037     | <i>Shewanella colwelliana</i> (AY653177)      | 98.79      |
| NCIA22  | <i>Seriola lalandi</i>   | PP277038     | <i>Vibrio</i> sp. (KM369839)                  | 97.40      |
| NCIA23  | <i>Seriola lalandi</i>   | PP294768     | <i>Vibrio kanaoae</i> (AJ316193)              | 99.68      |
| NCIA24  | <i>Seriola lalandi</i>   | PP294769     | <i>Vibrio lentus</i> (AY292935)               | 100        |
| NCIA25  | <i>Seriola lalandi</i>   | PP294770     | <i>Pseudomonas</i> sp. (JQ012958)             | 99.10      |
| NCIA26  | <i>Seriola lalandi</i>   | PP294771     | <i>Pseudomonas</i> sp. (EF451704)             | 98.60      |
| NCIA27  | <i>Seriola lalandi</i>   | PP263371     | <i>Shewanella algidipiscicola</i> (NR_041297) | 99.14      |
| NCIA28  | <i>Seriola lalandi</i>   | PP264675     | <i>Pseudomonas crudilactis</i> (NR_179985)    | 99.46      |
| NCIA29  | <i>Seriola lalandi</i>   | PP296421     | <i>Photobacterium</i> sp. (EU090138)          | 98.00      |
| NCIO14  | <i>Seriola lalandi</i>   | PP264921     | <i>Psychrobacter submarinus</i> (NR_027225)   | 100        |
| NCIO15  | <i>Seriola lalandi</i>   | PP264956     | <i>Psychrobacter piscatorii</i> (NR_112807)   | 98.13      |
| NCIO16  | <i>Seriola lalandi</i>   | PP265062     | <i>Psychrobacter piscatorii</i> (NR_112807)   | 100        |
| NCIO17  | <i>Seriola lalandi</i>   | PP265078     | <i>Psychrobacter maritimus</i> (NR_027225)    | 100        |
| NCIO18  | <i>Seriola lalandi</i>   | PP296423     | <i>Moellerella wisconsensis</i> (GQ451444)    | 99.10      |
| NCIO19  | <i>Seriola lalandi</i>   | PP297230     | <i>Providencia alcalifaciens</i> (AB480755)   | 97.94      |
| NCIS20  | <i>Seriola lalandi</i>   | PP265264     | <i>Shewanella algidipiscicola</i> (NR_041297) | 99.14      |
| NCIS22  | <i>Seriola lalandi</i>   | PP301860     | <i>Shewanella algidipiscicola</i> (NR_041297) | 98.72      |
| NCIS23  | <i>Seriola lalandi</i>   | PP297271     | <i>Vibrio</i> sp. (FJ457601)                  | 100        |
| NCIS24  | <i>Seriola lalandi</i>   | PP265273     | <i>Vibrio toranzoniae</i> (NR_117680)         | 99.25      |
| NCIS25  | <i>Seriola lalandi</i>   | PP297450     | <i>Pseudomonas gessardii</i> (KF478209)       | 99.30      |
| NCIS26  | <i>Seriola lalandi</i>   | PP297455     | <i>Pseudomonas fulva</i> (AB047001)           | 83.40      |
| NCIA56  | <i>Scomber japonicus</i> | PP297464     | <i>Vibrio kanaloae</i> (JN128262)             | 98.20      |
| NCIA57  | <i>Scomber japonicus</i> | PP301828     | <i>Pseudomonas jessenii</i> (AM933510)        | 100        |
| NCIA58  | <i>Scomber japonicus</i> | PP301894     | <i>Pseudomonas</i> sp. (HQ224649)             | 99.40      |
| NCIA59  | <i>Scomber japonicus</i> | PP265277     | <i>Pseudomonas crudilactis</i> (NR_179985)    | 99.57      |
| NCIO36  | <i>Scomber japonicus</i> | PP301968     | <i>Vibrio</i> sp. (AB038029)                  | 98.10      |
| NCIO37  | <i>Scomber japonicus</i> | PP301969     | <i>Pseudomonas</i> sp. (KT923307)             | 98.50      |
| NCIO38  | <i>Scomber japonicus</i> | PP301988     | <i>Shewanella arctica</i> (R_178284)          | 97.83      |
| NCIO39  | <i>Scomber japonicus</i> | PP302050     | <i>Pseudomonas fluorescens</i> (AB204715)     | 100        |
| NCIS45  | <i>Scomber japonicus</i> | PP265278     | <i>Brochothrix thermosphacta</i> (NR_113587)  | 99.88      |
| NCIS46  | <i>Scomber japonicus</i> | PP309615     | <i>Pseudomonas</i> sp. (KJ152096)             | 99.30      |
| NCIS47  | <i>Scomber japonicus</i> | PP265285     | <i>Pseudomonas deceptione</i> (NR_117552)     | 99.89      |
| NCIA1   | <i>Sarda chiliensis</i>  | PP309808     | <i>Pseudomonas</i> sp. (FJ002582)             | 100        |
| NCIA2   | <i>Sarda chiliensis</i>  | PP309816     | <i>Pseudomonas fluorescens</i> (AF228367)     | 99.86      |
| NCIA3   | <i>Sarda chiliensis</i>  | PP309838     | <i>Pseudomonas mandelii</i> (AY179326)        | 99.86      |
| NCIA4   | <i>Sarda chiliensis</i>  | PP309853     | <i>Pseudomonas</i> sp. (AY014829)             | 99.79      |

|        |                          |          |                                              |       |
|--------|--------------------------|----------|----------------------------------------------|-------|
| NCIA5  | <i>Sarda chiliensis</i>  | PP309854 | <i>Pseudomonas</i> sp. (FJ002582)            | 99.93 |
| NCIF4  | <i>Sarda chiliensis</i>  | PP309856 | <i>Pseudomonas</i> sp. (FJ002582)            | 99.93 |
| NCIF5  | <i>Sarda chiliensis</i>  | PP309920 | <i>Pseudomonas</i> sp. (AJ002801)            | 99.13 |
| NCIF6  | <i>Sarda chiliensis</i>  | PP309919 | <i>Pseudomonas</i> sp. (AY303304)            | 98.40 |
| NCIF7  | <i>Sarda chiliensis</i>  | PP266000 | <i>Pseudomonas lactucae</i> (NR_179365)      | 99.46 |
| NCIF8  | <i>Sarda chiliensis</i>  | PP266006 | <i>Pseudomonas crudilactis</i> (OR673555)    | 99.46 |
| NCIF9  | <i>Sarda chiliensis</i>  | PP317017 | <i>Pseudomonas</i> sp. (AJ002801)            | 99.21 |
| NCIO2  | <i>Sarda chiliensis</i>  | PP317016 | <i>Acinetobacter johnsonii</i> (FJ976603)    | 100   |
| NCIO4  | <i>Sarda chiliensis</i>  | PP272032 | <i>Brochothrix thermosphacta</i> (NR_113587) | 99.88 |
| NCIO5  | <i>Sarda chiliensis</i>  | PP266007 | <i>Brochothrix thermosphacta</i> (NR_113587) | 99.65 |
| NCIO7  | <i>Sarda chiliensis</i>  | PP317133 | <i>Shewanella baltica</i> (AY771739)         | 96.10 |
| NCIO8  | <i>Sarda chiliensis</i>  | PP317291 | <i>Pseudomonas fragi</i> (AM062695)          | 99.86 |
| NCIO9  | <i>Sarda chiliensis</i>  | PP317292 | <i>Pseudomonas fragi</i> (AM062695)          | 99.71 |
| NCIO10 | <i>Sarda chiliensis</i>  | PP317367 | <i>Pseudomonas fragi</i> (AM062695)          | 99.79 |
| NCIS3  | <i>Sarda chiliensis</i>  | PP317368 | <i>Shewanella</i> sp. (AF022401)             | 99.79 |
| NCIS4  | <i>Sarda chiliensis</i>  | PP266434 | <i>Brochothrix thermosphacta</i> (NR_113587) | 100   |
| NCIS5  | <i>Sarda chiliensis</i>  | PP270284 | <i>Brochothrix thermosphacta</i> (NR_113587) | 98.93 |
| NCIS6  | <i>Sarda chiliensis</i>  | PP266932 | <i>Pseudomonas frederiksber</i> (NR_117177)  | 99.36 |
| NCIS7  | <i>Sarda chiliensis</i>  | PP266933 | <i>Myroides phaeus</i> (NR_117475)           | 99.46 |
| NCIS8  | <i>Sarda chiliensis</i>  | PP320223 | <i>Pseudomonas fragi</i> (AM062695)          | 99.71 |
| NCIA60 | <i>Trachurus murphyi</i> | PP272033 | <i>Pseudomonas crudilactis</i> (NR_179985)   | 99.46 |
| NCIA61 | <i>Trachurus murphyi</i> | PP320224 | <i>Shewanella</i> sp. (FJ169982)             | 97.30 |
| NCIA62 | <i>Trachurus murphyi</i> | PP320225 | <i>Pseudomonas</i> sp. (KR054995)            | 98.20 |
| NCIF1  | <i>Trachurus murphyi</i> | PP320227 | <i>Pseudomonas fragi</i> (AF094733)          | 99.64 |
| NCIF2  | <i>Trachurus murphyi</i> | PP266935 | <i>Pseudomonas kielensis</i> (NR_181570)     | 99.47 |
| NCIF3  | <i>Trachurus murphyi</i> | PP320226 | <i>Brevibacterium</i> sp. (JQ680447)         | 99.30 |
| NCIF24 | <i>Trachurus murphyi</i> | PP266937 | <i>Pseudomonas crudilactis</i> (NR_179985)   | 99.57 |
| NCIF25 | <i>Trachurus murphyi</i> | PP320229 | <i>Pseudomonas</i> sp. (FJ379535)            | 100   |
| NCIF26 | <i>Trachurus murphyi</i> | PP320228 | <i>Pseudomonas</i> sp. (AM421975)            | 99.20 |
| NCIO1  | <i>Trachurus murphyi</i> | PP325872 | <i>Pseudomonas</i> sp. (GU062532)            | 99.86 |
| NCIO40 | <i>Trachurus murphyi</i> | PP325873 | <i>Shewanella putrefaciens</i> (AB205573)    | 100   |
| NCIO41 | <i>Trachurus murphyi</i> | PP325876 | <i>Pseudomonas</i> sp. (AM409370)            | 97.30 |
| NCIO42 | <i>Trachurus murphyi</i> | PP267450 | <i>Psychrobacter immobilis</i> (NR_113805)   | 99.77 |
| NCIO43 | <i>Trachurus murphyi</i> | PP325875 | <i>Shewanella putrefaciens</i> (AB205573)    | 99.40 |
| NCIS1  | <i>Trachurus murphyi</i> | PP325878 | <i>Shewanella marina</i> (EU290154)          | 98.60 |
| NCIS48 | <i>Trachurus murphyi</i> | PP267452 | <i>Brochothrix thermosphacta</i> (NR_113587) | 99.46 |
| NCIS49 | <i>Trachurus murphyi</i> | PP267451 | <i>Shewanella halifaxensis</i> (NR_074822)   | 99.77 |
| NCIS50 | <i>Trachurus murphyi</i> | PP325877 | <i>Shewanella marina</i> (EU290154)          | 97.10 |
