# Supplementary material for: Occurrence of Antimicrobial-Resistant Bacteria in Intestinal Contents of Wild Marine Fish in Chile
Source: MDPI journal article supplement (doi:10.3390/antibiotics13040332), 2024-04-05
Supplement: s1 [file s1]

**Table S2. Identification and source of resistant isolates from intestinal content of demersal fishes.**

| Isolate | Fish species                     | Accession N° | Closest species (Accession N°)             | % Identity |
|---------|----------------------------------|--------------|--------------------------------------------|------------|
| NCIA6   | <i>Merluccius gayi gayi</i>      | PP326983     | <i>Pseudomonas fluorescens</i> (AF228367)  | 85.50      |
| NCIA7   | <i>Merluccius gayi gayi</i>      | PP326984     | <i>Vibrio</i> sp. (DQ146980)               | 99.29      |
| NCIA8   | <i>Merluccius gayi gayi</i>      | PP326985     | <i>Pseudomonas fluorescens</i> (AF228367)  | 98.60      |
| NCIA9   | <i>Merluccius gayi gayi</i>      | PP326986     | <i>Pseudomonas</i> sp. (AY014829)          | 99.86      |
| NCIA10  | <i>Merluccius gayi gayi</i>      | PP326988     | <i>Pseudomonas</i> sp. (JQ012960)          | 100        |
| NCIA11  | <i>Merluccius gayi gayi</i>      | PP267453     | <i>Pseudomonas crudilactis</i> (NR_179985) | 99.36      |
| NCIF10  | <i>Merluccius gayi gayi</i>      | PP326990     | <i>Pseudomonas</i> sp. (FJ002582)          | 99.79      |
| NCIF12  | <i>Merluccius gayi gayi</i>      | PP326991     | <i>Pseudomonas</i> sp. (FJ002582)          | 99.93      |
| NCIF13  | <i>Merluccius gayi gayi</i>      | PP326992     | <i>Pseudomonas</i> sp. (FJ379535)          | 97.40      |
| NCIO11  | <i>Merluccius gayi gayi</i>      | PP326994     | <i>Acinetobacter johnsonii</i> (EU977635)  | 99.84      |
| NCIO12  | <i>Merluccius gayi gayi</i>      | PP267454     | <i>Psychrobacter cibarius</i> (NR_043057)  | 99.36      |
| NCIO13  | <i>Merluccius gayi gayi</i>      | PP272034     | <i>Psychrobacter maritimus</i> (NR_027225) | 100        |
| NCIS9   | <i>Merluccius gayi gayi</i>      | PP326993     | <i>Pseudomonas</i> sp. (DQ683573)          | 96.90      |
| NCIS10  | <i>Merluccius gayi gayi</i>      | PP326995     | <i>Pseudomonas</i> sp. (AM398216)          | 100        |
| NCIS11  | <i>Merluccius gayi gayi</i>      | PP326996     | <i>Vibrio toranzoniae</i> (HE978311)       | 100        |
| NCIS12  | <i>Merluccius gayi gayi</i>      | PP326999     | <i>Pseudomonas fluorescens</i> (AF228367)  | 100        |
| NCIA46  | <i>Menticirrhus ophicephalus</i> | PP326998     | <i>Vibrio lentus</i> (AY292935)            | 99.50      |
| NCIA47  | <i>Menticirrhus ophicephalus</i> | PP327001     | <i>Vibrio lentus</i> (AY292935)            | 99.10      |
| NCIA48  | <i>Menticirrhus ophicephalus</i> | PP327000     | <i>Vibrio toranzoniae</i> (HE978311)       | 100        |
| NCIA49  | <i>Menticirrhus ophicephalus</i> | PP327004     | <i>Pseudomonas</i> sp. (FJ379535)          | 100        |
| NCIA50  | <i>Menticirrhus ophicephalus</i> | PP327006     | <i>Pseudomonas</i> sp. (JQ012960)          | 100        |
| NCIA51  | <i>Menticirrhus ophicephalus</i> | PP327007     | <i>Shewanella</i> sp. (FJ231175)           | 100        |
| NCIA52  | <i>Menticirrhus ophicephalus</i> | PP327011     | <i>Vibrio kanaloae</i> (NR_114804)         | 99.34      |
| NCIA53  | <i>Menticirrhus ophicephalus</i> | PP327010     | <i>Photobacterium</i> sp. (FJ457575)       | 97.60      |
| NCIA54  | <i>Menticirrhus ophicephalus</i> | PP327012     | <i>Vibrio lentus</i> (AY292935)            | 99.00      |
| NCIA55  | <i>Menticirrhus ophicephalus</i> | PP327013     | <i>Vibrio toranzoniae</i> (HE978311)       | 100        |
| NCIF19  | <i>Menticirrhus ophicephalus</i> | PP327015     | <i>Pseudomonas</i> sp (JQ012960)           | 100        |
| NCIF20  | <i>Menticirrhus ophicephalus</i> | PP327014     | <i>Pseudomonas</i> sp. (HM196354)          | 98.60      |
| NCIF21  | <i>Menticirrhus ophicephalus</i> | PP327017     | <i>Pseudomonas jessenii</i> (AM933510)     | 100        |
| NCIF22  | <i>Menticirrhus ophicephalus</i> | PP327016     | <i>Pseudomonas gessardii</i> (AF074384)    | 98.10      |
| NCIF23  | <i>Menticirrhus ophicephalus</i> | PP327028     | <i>Pseudomonas</i> sp. (AY573031)          | 99.30      |
| NCIO26  | <i>Menticirrhus ophicephalus</i> | PP327029     | <i>Moellerella wisconsensis</i> (KP058388) | 99.40      |
| NCIO27  | <i>Menticirrhus ophicephalus</i> | PP327214     | <i>Proteus vulgaris</i> (KC210847)         | 98.30      |
| NCIO28  | <i>Menticirrhus ophicephalus</i> | PP327215     | <i>Pseudoalteromonas</i> sp. (GU062519)    | 99.30      |
| NCIO31  | <i>Menticirrhus ophicephalus</i> | PP267455     | <i>Psychrobacter immobilis</i> (NR_113805) | 99.88      |
| NCIO32  | <i>Menticirrhus ophicephalus</i> | PP327270     | <i>Shewanella</i> sp. (EU075118)           | 99.60      |
| NCIO33  | <i>Menticirrhus ophicephalus</i> | PP267456     | <i>Psychrobacter cibarius</i> (NR_043057)  | 99.79      |

|         |                                  |          |                                                |       |
|---------|----------------------------------|----------|------------------------------------------------|-------|
| NCIO35  | <i>Menticirrhus ophicephalus</i> | PP327366 | <i>Shewanella</i> sp. (EU075116)               | 98.10 |
| NCIS38  | <i>Menticirrhus ophicephalus</i> | PP327367 | <i>Aliivibrio finisterrensis</i> (EU541616)    | 94.10 |
| NCIS39  | <i>Menticirrhus ophicephalus</i> | PP267457 | <i>Pseudoalteromonas elyakovii</i> (NR_028722) | 99.25 |
| NCIS40  | <i>Menticirrhus ophicephalus</i> | PP328540 | <i>Aliivibrio fischeri</i> (AY292949)          | 98.20 |
| NCIS41  | <i>Menticirrhus ophicephalus</i> | PP328541 | <i>Aliivibrio fischeri</i> (AY292949)          | 97.10 |
| NCIS42  | <i>Menticirrhus ophicephalus</i> | PP328543 | <i>Shewanella marinintestina</i> (AB081758)    | 100.0 |
| NCIS43  | <i>Menticirrhus ophicephalus</i> | PP328545 | <i>Aliivibrio fischeri</i> (AY292949)          | 98.20 |
| NCIA30  | <i>Pinguipes chilensis</i>       | PP328579 | <i>Vibrio splendidus</i> (AJ874367)            | 100   |
| NCIA31  | <i>Pinguipes chilensis</i>       | PP328590 | <i>Vibrio</i> sp. (AF242274)                   | 100   |
| NCIA32  | <i>Pinguipes chilensis</i>       | PP328775 | <i>Vibrio lentus</i> (AY292935)                | 100   |
| NCIA33  | <i>Pinguipes chilensis</i>       | PP328776 | <i>Vibrio</i> sp. (DQ328955)                   | 100   |
| NCIA34  | <i>Pinguipes chilensis</i>       | PP331442 | <i>Vibrio</i> sp. (DQ480140)                   | 94.00 |
| NCIA35  | <i>Pinguipes chilensis</i>       | PP331448 | <i>Vibrio</i> sp. (FJ457534)                   | 100   |
| NCIA36  | <i>Pinguipes chilensis</i>       | PP331491 | <i>Vibrio</i> sp. (FR744824)                   | 100   |
| NCIA37  | <i>Pinguipes chilensis</i>       | PP331796 | <i>Vibrio</i> sp. (FJ457352)                   | 100   |
| NCIS28  | <i>Pinguipes chilensis</i>       | PP267458 | <i>Vibrio crassostreae</i> (NR_044078)         | 99.14 |
| NCIA14  | <i>Prolatilus jugularis</i>      | PP267503 | <i>Photobacterium carnosum</i> (NR_156814)     | 97.75 |
| NCIA15  | <i>Prolatilus jugularis</i>      | PP331805 | <i>Vibrio</i> sp. (AF242274)                   | 99.20 |
| NCIA16  | <i>Prolatilus jugularis</i>      | PP267504 | <i>Vibrio alginolyticus</i> (NR_122050)        | 99.36 |
| NCIA17  | <i>Prolatilus jugularis</i>      | PP267505 | <i>Vibrio alginolyticus</i> (NR_122059)        | 99.36 |
| NCIA18  | <i>Prolatilus jugularis</i>      | PP331845 | <i>Shewanella woodyi</i> (JF412212)            | 97.10 |
| NCIA19  | <i>Prolatilus jugularis</i>      | PP267506 | <i>Photobacterium carnosum</i> (NR_156814)     | 98.18 |
| NCIA20  | <i>Prolatilus jugularis</i>      | PP331856 | <i>Vibrio kanaloae</i> (JN128262)              | 100   |
| NCIS14  | <i>Prolatilus jugularis</i>      | PP332289 | <i>Aliivibrio</i> sp. (EU862334)               | 100   |
| NCIS14b | <i>Prolatilus jugularis</i>      | PP332290 | <i>Aliivibrio fischeri</i> (AY292920)          | 98.70 |
| NCIS15b | <i>Prolatilus jugularis</i>      |          | <i>Vibrio crassostreae</i> (NR_044078)         | 99.25 |
| NCIS16  | <i>Prolatilus jugularis</i>      | PP332294 | <i>Aliivibrio logei</i> (JF412238)             | 100   |
| NCIS16b | <i>Prolatilus jugularis</i>      | PP267551 | <i>Vibrio chemaguriensis</i> (NR_179846)       | 99.18 |
| NCIS17  | <i>Prolatilus jugularis</i>      | PP267552 | <i>Photobacterium aquimaris</i> (NR_114269)    | 99.77 |
| NCIS18  | <i>Prolatilus jugularis</i>      | PP332295 | <i>Aliivibrio finisterrensis</i> (EU541614)    | 96.30 |
| NCIS19  | <i>Prolatilus jugularis</i>      | PP332310 | <i>Shewanella woodyi</i> (JF4122079)           | 98.10 |
| NCIA12  | <i>Genypterus chilensis</i>      | PP333039 | <i>Vibrio lentus</i> (AY292935)                | 100   |
| NCIS13  | <i>Genypterus chilensis</i>      | PP332397 | <i>Shewanella</i> sp. (FN295775)               | 99.30 |
| NCIS15  | <i>Genypterus chilensis</i>      | PP270283 | <i>Photobacterium sanguinican</i> (NR_146675)  | 99.79 |
